# Supplementary material for: TLR-Mediated Inflammatory Responses to Streptococcus pneumoniae Are Highly Dependent on Surface Expression of Bacterial Lipoproteins
Source: PubMed Central journal article supplement (PMC4170674; doi:10.4049/jimmunol.1401413), 2014-08-29
Supplement: 1401413_JI_1401413_Supplemental_Material_1.pdf [file 1401413_JI_1401413_Supplemental_Material_1.pdf]

**Supplementary Table 1.**

Single nucleotide polymorphisms identified in the genome sequences of the TIGR4 and D39 *Algt* strains compared to their parental strains.

| <b>Genome position</b>  | <b>Gene affected</b> | <b>Reference bp / codon</b> | <b>Mutant bp / codon</b> | <b>Notes</b>                                                                        |
|-------------------------|----------------------|-----------------------------|--------------------------|-------------------------------------------------------------------------------------|
| <b>D39<i>Algt</i></b>   |                      |                             |                          |                                                                                     |
| 1272512                 | SPD_1244 <i>hprK</i> | ATC                         | ATA                      | Synonymous mutation                                                                 |
| 1272548                 | SPD_1244 <i>hprK</i> | GCG                         | GCT                      | Synonymous mutation                                                                 |
|                         |                      |                             |                          |                                                                                     |
| <b>TIGR4<i>Algt</i></b> |                      |                             |                          |                                                                                     |
| 730678                  | Intergenic region    | C                           | T                        | n/a                                                                                 |
| 1332449                 | SP_1413 <i>hprK</i>  | GCG                         | GCT                      | Synonymous mutation                                                                 |
| 1332584                 | SP_1413 <i>hprK</i>  | AAT                         | AAC                      | Synonymous mutation                                                                 |
| 2092182                 | SP_2175 <i>dltB</i>  | CAT                         | CGT                      | Non-synonymous mutation: changes a histidine for an arginine at position 336 of 413 |

Supplementary Fig. 1

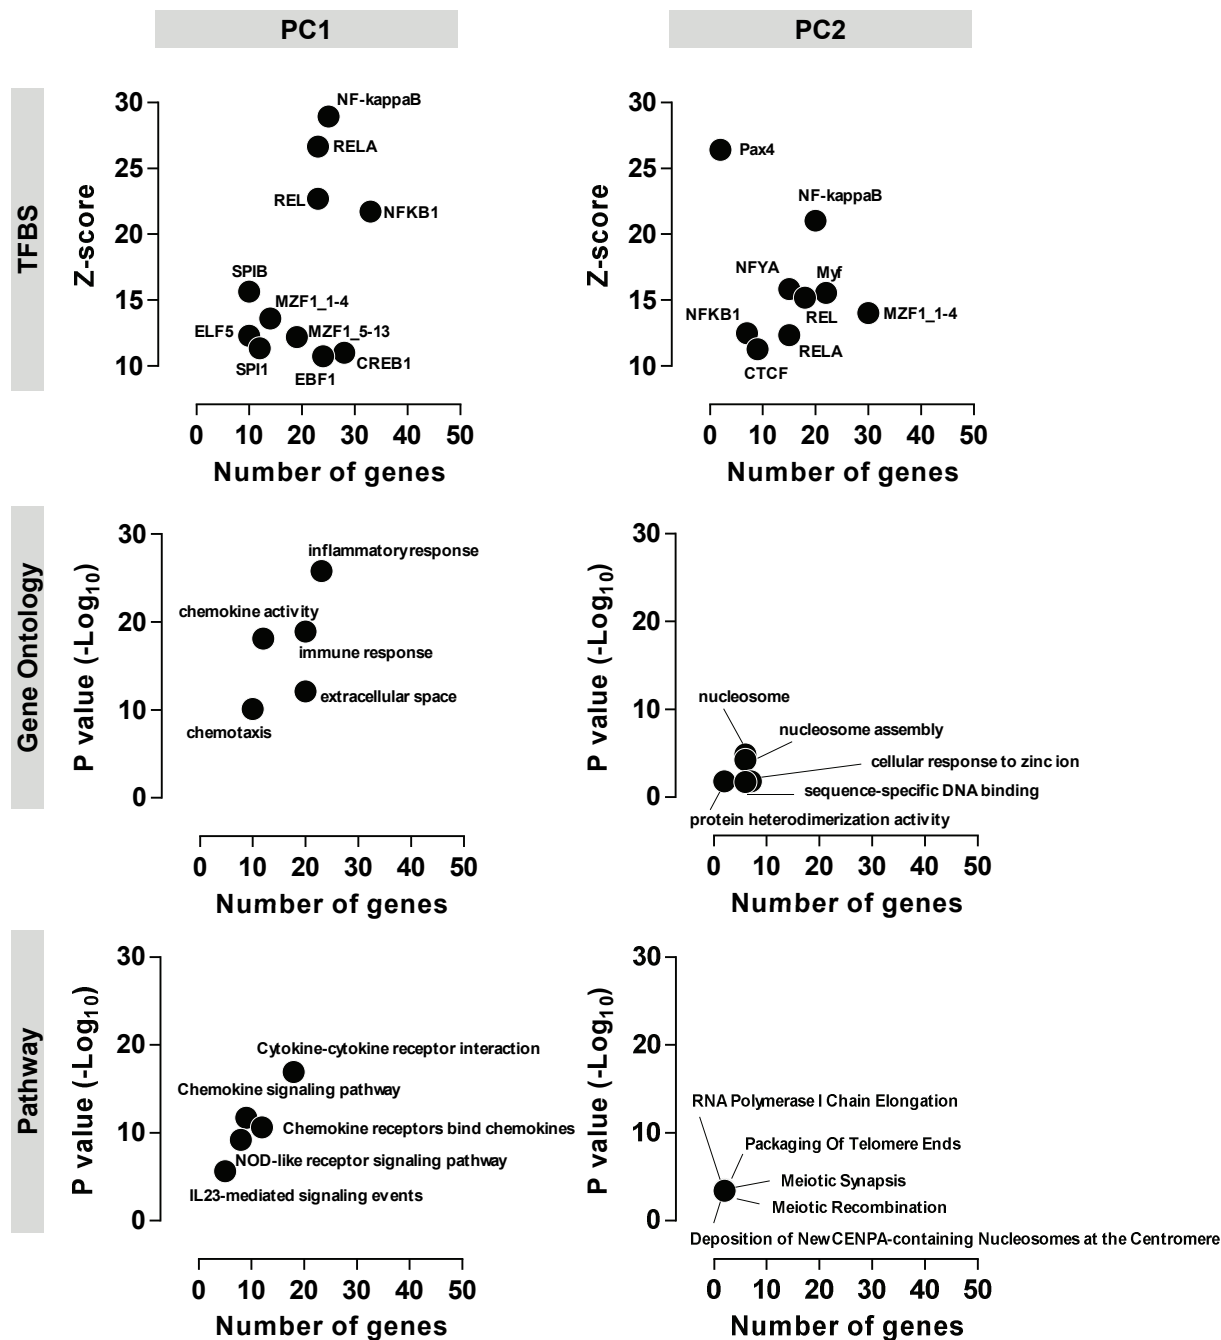

The top 50 transcriptional responses associated with principal component (PC)1 and PC2 in Figure 6D-E were subjected to transcription factor binding site (TFBS) enrichment analysis using oPossum (<http://opossum.cisreg.ca/oPOSSUM3/>), and to Gene Ontology and Pathway enrichment analyses using innateDB (<http://www.innatedb.com/>). In each case the test statistic (Z-score or corrected P value) and the number of genes associated with each annotation is presented as an individual data point. A Z-score >10 and  $-\text{Log}_{10} P > 1.3$  are considered statistically significant.

## Supplementary Fig. 2

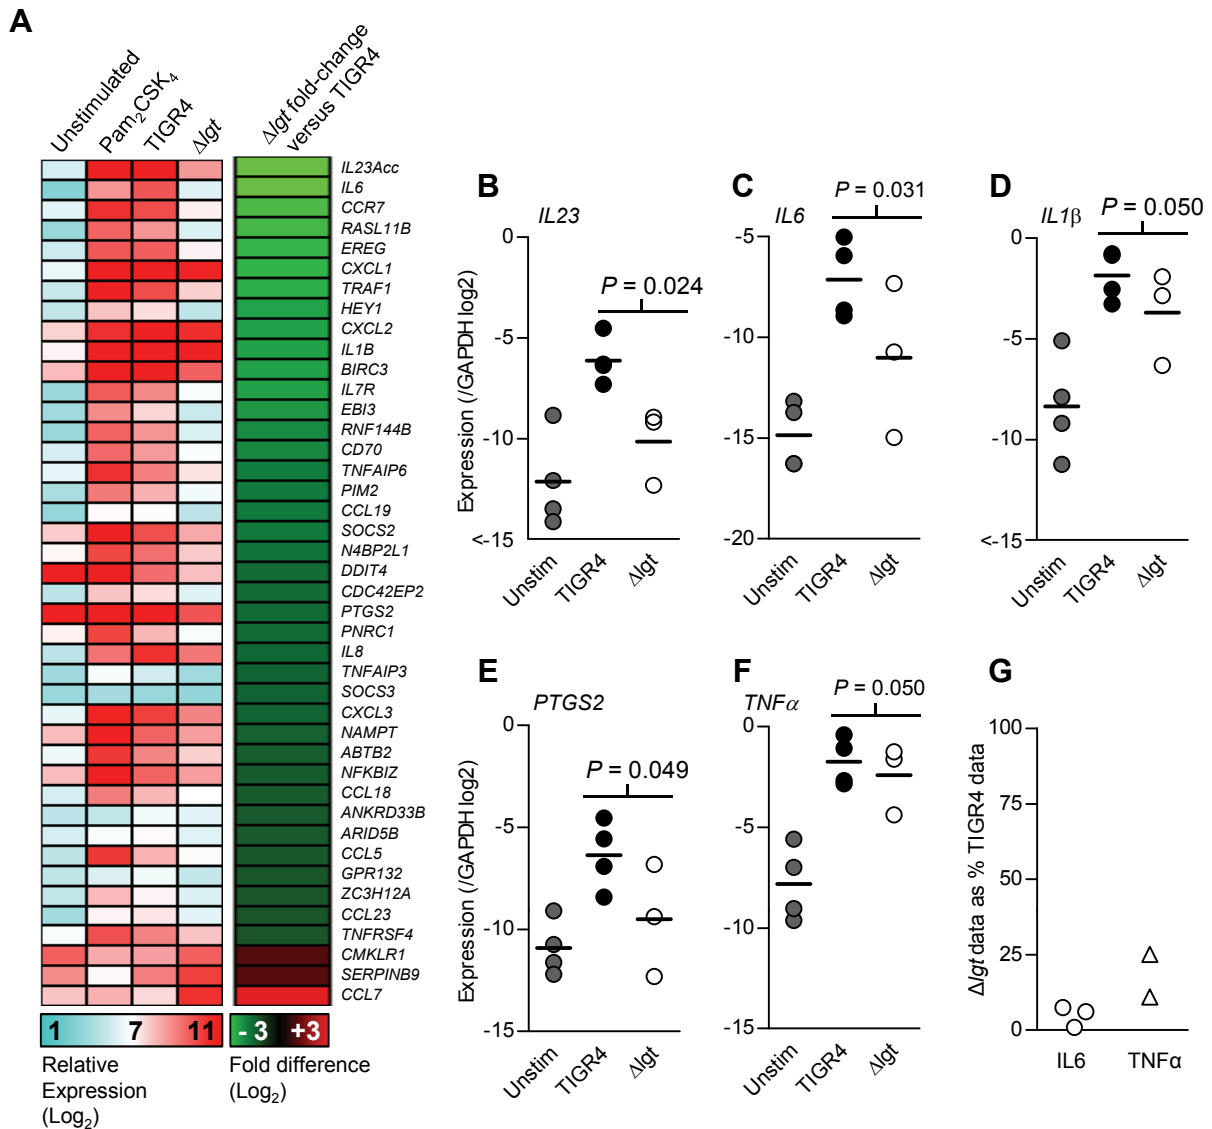

(A) Gene expression heat map for mean relative gene expression levels and fold differences for the 42 genes showing significant differences in expression ( $P < 0.05$ ) between human monocyte derived macrophages (MDM) from at least three different donors stimulated for four hours with TIGR4 or  $\Delta$ lgt *S. pneumoniae*. (B-F) Validation using qPCR (normalised to GAPDH expression) of selected pro-inflammatory genes showing reduced expression in the transcriptional array analysis after incubation with  $\Delta$ lgt strain compared to TIGR4. (G) Relative supernatant levels of IL-6 and TNF $\alpha$  (measured using a luminex system) in cell culture supernatants of MDMs incubated with the  $\Delta$ lgt strain expressed as a percentage of the result for the same donor when incubated with the TIGR4 strain. For panels (B) to (G) each symbol represents results from a single donor, and the bars medians.  $P$  values are for comparisons of results for MDM stimulated with the TIGR4 or  $\Delta$ lgt strains (paired t tests).

### Supplementary Fig. 3

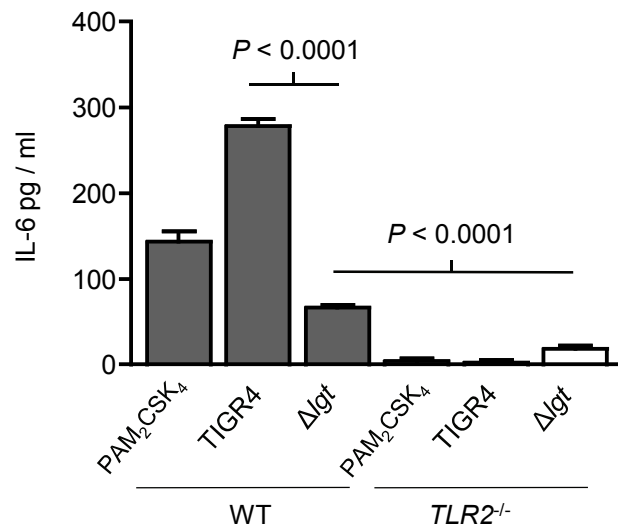

IL6 concentrations in cell culture supernatants from BMDMs obtained from C57BL/6 and *TLR2*<sup>-/-</sup> mice incubated for 4 hours with the TLR2 agonist Pam<sub>2</sub>CSK<sub>4</sub>, or TIGR4 or TIGR4Δlgt *S. pneumoniae* strains. n = 3 to 4, error bars represent SEMs, and the stated P values were obtained using unpaired t tests.
